# Supplementary material for: Hormone receptor status may impact the survival benefit of surgery in stage IV breast cancer: a population-based study
Source: PubMed Central journal article supplement (PMC5342604; doi:10.18632/oncotarget.11235), 2016-08-11
Supplement: oncotarget-07-70991-s001.pdf [file oncotarget-07-70991-s001.pdf]

## Hormone receptor status may impact the survival benefit of surgery in stage iv breast cancer: a population-based study

### Supplementary Material

Supplement Table 1: Clinical and pathological features of the study population

| Variance                   | HR+ (n=6554) | HR- (n=2401) | Unknown (n=1486) | <i>P</i> value* |
|----------------------------|--------------|--------------|------------------|-----------------|
| <b>Age (%)</b>             |              |              |                  | <0.001          |
| ≤45years                   | 917 (14.0)   | 447 (18.6)   | 136 (9.2)        |                 |
| >45years                   | 5637 (86.0)  | 1954 (81.4)  | 1350 (90.8)      |                 |
| <b>Race (%)</b>            |              |              |                  | <0.001          |
| White                      | 5181 (79.1)  | 1692 (70.5)  | 1132 (76.2)      |                 |
| Black                      | 907 (13.8)   | 529 (22.0)   | 272 (18.3)       |                 |
| Other                      | 444 (6.8)    | 174 (7.2)    | 74 (5.0)         |                 |
| Unknown                    | 22 (0.3)     | 6 (0.2)      | 8 (0.5)          |                 |
| <b>Grade (%)</b>           |              |              |                  | <0.001          |
| Well                       | 515 (7.9)    | 37 (1.5)     | 32 (2.2)         |                 |
| Moderate                   | 2356 (35.9)  | 394 (16.4)   | 186 (12.5)       |                 |
| Poor                       | 2286 (34.9)  | 1607 (66.9)  | 337 (22.7)       |                 |
| Unknown                    | 1397 (21.3)  | 363 (15.1)   | 931 (62.7)       |                 |
| <b>Stage T (%)</b>         |              |              |                  | <0.001          |
| T0                         | 127 (1.9)    | 25 (1.0)     | 54 (3.6)         |                 |
| T1                         | 794 (12.1)   | 267 (11.1)   | 85 (5.7)         |                 |
| T2                         | 1752 (26.7)  | 530 (22.1)   | 203 (13.7)       |                 |
| T3                         | 757 (11.6)   | 303 (12.6)   | 80 (5.4)         |                 |
| T4                         | 2039 (31.1)  | 948 (39.5)   | 381 (25.6)       |                 |
| Tx                         | 1085 (16.6)  | 328 (13.7)   | 683 (46.0)       |                 |
| <b>Stage N (%)</b>         |              |              |                  | <0.001          |
| 0                          | 1485 (22.7)  | 444 (18.5)   | 285 (19.2)       |                 |
| 1                          | 2224 (33.9)  | 865 (36.0)   | 371 (25.0)       |                 |
| 2                          | 800 (12.2)   | 282 (11.7)   | 82 (5.5)         |                 |
| 3                          | 897 (13.7)   | 477 (19.9)   | 93 (6.3)         |                 |
| NX                         | 1148 (17.5)  | 333 (13.9)   | 655 (44.1)       |                 |
| <b>Radiation (%)</b>       |              |              |                  | 0.033           |
| Done                       | 2484 (37.9)  | 847 (35.3)   | 355 (23.9)       |                 |
| None                       | 3950 (60.3)  | 1498 (62.4)  | 1093 (73.6)      |                 |
| Unknown                    | 120 (1.8)    | 56 (2.3)     | 38 (2.6)         |                 |
| <b>Surgery (%)</b>         |              |              |                  | <0.001          |
| R0 resection               | 184 (2.8)    | 70 (2.9)     | 18 (1.2)         |                 |
| Primary resection          | 2646 (40.4)  | 1095 (45.6)  | 284 (19.1)       |                 |
| Metastases resection       | 252 (3.8)    | 74 (3.1)     | 83 (5.6)         |                 |
| No resection               | 3472 (53.0)  | 1162 (48.4)  | 1101 (74.1)      |                 |
| <b>Metastatic site (%)</b> |              |              |                  | <0.001          |

|                    |             |            |            |
|--------------------|-------------|------------|------------|
| Distant lymph node | 324 (4.9)   | 212 (8.8)  | 60 (4.0)   |
| Designated organs  | 3003 (45.8) | 798 (33.2) | 562 (37.8) |
| Other organs       | 2316 (35.3) | 935 (38.9) | 662 (44.5) |
| Multiple           | 837 (12.8)  | 412 (17.2) | 162 (10.9) |
| Unknown            | 74 (1.1)    | 44 (1.8)   | 40 (2.7)   |

HR+ was defined as ER+ or PR+. HR- was defined as both ER- and PR-.

\* Comparison between HR+ and HR- populations.

Supplement Table 2: Univariate analyses of factors predicting surgery<sup>a</sup>

| Variance         | Sample size | % of sample size | Surgery rate | OR    | P value <sup>b</sup> |
|------------------|-------------|------------------|--------------|-------|----------------------|
| <b>Age</b>       |             |                  |              |       |                      |
| ≤45years         | 1500        | 14.4%            | 55.7%        | Ref   |                      |
| >45years         | 8941        | 85.6%            | 43.3%        | 0.606 | <0.001               |
| <b>Race</b>      |             |                  |              |       |                      |
| White            | 8005        | 76.7%            | 45.5%        | Ref   |                      |
| Black            | 1708        | 16.4%            | 42.1%        | 0.871 | 0.010                |
| Other            | 692         | 6.6%             | 48.1%        | 1.111 | 0.184                |
| Unknown          | 36          | 0.3%             | 33.3%        | 0.599 | 0.148                |
| <b>Grade</b>     |             |                  |              |       |                      |
| Well             | 584         | 5.6%             | 51.4%        | Ref   |                      |
| Moderate         | 2936        | 28.1%            | 50.3%        | 0.957 | 0.628                |
| Poor             | 4230        | 40.5%            | 55.9%        | 1.198 | 0.041                |
| Unknown          | 2691        | 25.8%            | 21.1%        | 0.253 | <0.001               |
| <b>Stage T</b>   |             |                  |              |       |                      |
| T1               | 1146        | 11.0%            | 62.0%        | Ref   |                      |
| T2               | 2485        | 23.8%            | 61.8%        | 0.992 | 0.916                |
| T3               | 1140        | 10.9%            | 58.4%        | 0.863 | 0.084                |
| T4               | 3368        | 32.3%            | 41.1%        | 0.428 | <0.001               |
| Tx               | 2302        | 22.0%            | 17.9%        | 0.133 | <0.001               |
| <b>Stage N</b>   |             |                  |              |       |                      |
| 0                | 2214        | 21.2%            | 42.6%        | Ref   |                      |
| 1                | 3460        | 33.1%            | 43.5%        | 1.036 | 0.516                |
| 2                | 1164        | 11.1%            | 70.2%        | 3.173 | <0.001               |
| 3                | 1467        | 14.1%            | 65.8%        | 2.591 | <0.001               |
| NX               | 2136        | 20.5%            | 22.3%        | 0.388 | <0.001               |
| <b>Radiation</b> |             |                  |              |       |                      |
| Done             | 3686        | 35.3%            | 54.3%        | Ref   |                      |
| None             | 6541        | 62.6%            | 39.2%        | 0.542 | <0.001               |

|                                |      |       |       |       |        |
|--------------------------------|------|-------|-------|-------|--------|
| Unknown                        | 214  | 2.0%  | 66.8% | 1.696 | <0.001 |
| <b>ER</b>                      |      |       |       |       |        |
| Positive                       | 6420 | 61.5% | 47.0% | Ref   |        |
| Negative                       | 2550 | 24.4% | 51.3% | 1.190 | <0.001 |
| Unknown                        | 1471 | 14.1% | 25.8% | 0.393 | <0.001 |
| <b>PR</b>                      |      |       |       |       |        |
| Positive                       | 4884 | 46.8% | 47.3% | Ref   |        |
| Negative                       | 3907 | 37.4% | 50.0% | 1.115 | 0.011  |
| Unknown                        | 1650 | 15.8% | 26.8% | 0.408 | <0.001 |
| <b>HR</b>                      |      |       |       |       |        |
| HR+                            | 6554 | 62.8% | 47.0% | Ref   |        |
| HR-                            | 2401 | 23.0% | 51.6% | 1.201 | <0.001 |
| Unknown                        | 1486 | 14.2% | 25.9% | 0.394 | <0.001 |
| <b>Metastatic site</b>         |      |       |       |       |        |
| Distant lymph node             | 596  | 5.7%  | 67.8% | Ref   |        |
| Designated organs <sup>c</sup> | 4363 | 41.8% | 45.2% | 0.391 | <0.001 |
| Other organs                   | 3913 | 37.5% | 44.7% | 0.384 | <0.001 |
| Multiple <sup>d</sup>          | 1411 | 13.5% | 35.3% | 0.259 | <0.001 |
| Unknown                        | 158  | 1.5%  | 53.8% | 0.553 | 0.001  |

OR odds ratio. ER, estrogen receptor; PR, progesterone receptor; HR+ was defined as ER+ or PR+. HR- was defined as both ER- and PR-.

<sup>a</sup> Surgery including the R0 resection, primary resection and metastases resection groups.

<sup>b</sup> OR of surgery (vs. no surgery) and *P* value from univariate logistic regression

<sup>c</sup> Designated organs, metastasis in the following organs: adrenal (suprarenal) gland, bone, other than the adjacent rib, contralateral (opposite) breast, lung, ovary, satellite nodule(s) in skin other than the primary breast.

<sup>d</sup> Multiple mean metastases in at least two of the above sites.

Supplement Table 3: Multivariate model of factors predicting surgery

| <b>Variance</b>                | <b>P value<sup>a</sup></b> | <b>OR</b> | <b>95%CI</b> |
|--------------------------------|----------------------------|-----------|--------------|
| <b>Age</b>                     |                            |           |              |
| <=45years old                  |                            | Ref       |              |
| >45years old                   | 0.039                      | 0.842     | 0.716-0.991  |
| <b>Race</b>                    |                            |           |              |
| White                          |                            | Ref       |              |
| Black                          | <0.001                     | 0.736     | 0.628-0.863  |
| Other                          | 0.037                      | 0.789     | 0.632-0.986  |
| <b>Grade</b>                   |                            |           |              |
| Well                           |                            | Ref       |              |
| Moderate                       | 0.886                      | 1.018     | 0.801-1.293  |
| Poor                           | 0.023                      | 1.324     | 1.040-1.686  |
| <b>Stage T</b>                 |                            |           |              |
| T1 <sup>a</sup>                |                            | Ref       |              |
| T2                             | 0.557                      | 0.943     | 0.777-1.146  |
| T3                             | <0.001                     | 0.637     | 0.509-0.796  |
| T4                             | <0.001                     | 0.336     | 0.277-0.407  |
| <b>Stage N</b>                 |                            |           |              |
| 0                              |                            | Ref       |              |
| 1                              | 0.158                      | 1.114     | 0.959-1.295  |
| 2                              | <0.001                     | 3.393     | 2.764-4.164  |
| 3                              | <0.001                     | 3.159     | 2.601-3.837  |
| <b>Radiation</b>               |                            |           |              |
| Done                           |                            | Ref       |              |
| None                           | <0.001                     | 0.565     | 0.500-0.640  |
| <b>HR</b>                      |                            |           |              |
| HR+                            |                            | Ref       |              |
| HR-                            | 0.814                      | 0.983     | 0.856-1.130  |
| <b>Metastatic site</b>         |                            |           |              |
| Distant lymph node             |                            | Ref       |              |
| Designated organs <sup>b</sup> | <0.001                     | 0.533     | 0.408-0.698  |
| Other organs                   | <0.001                     | 0.562     | 0.429-0.737  |
| Multiple <sup>c</sup>          | <0.001                     | 0.244     | 0.182-0.328  |

OR, odds ratio. HR- was defined as both ER- and PR-.

<sup>a</sup> T0 merged into T1 when performing Cox multivariate analysis

<sup>b</sup> Designated organs, metastasis in the following organs: adrenal (suprarenal) gland, bone, other than the adjacent rib, contralateral (opposite) breast, lung, ovary, satellite nodule(s) in skin other than the primary breast.

<sup>c</sup> Multiple mean metastases in at least two of the above sites.
